# Supplementary material for: Evaluation of multi-antigen serological screening for active tuberculosis among people living with HIV
Source: PubMed Central journal article supplement (PMC7272080; doi:10.1371/journal.pone.0234130), 2020-06-04
Supplement: pone.0234130.s002.pdf [file pone.0234130.s002.pdf]

**S1 Table. Comparison of Median Antibody Responses to *M. tuberculosis* antigens by pulmonary TB status in Kampala, Uganda**

| <b>TB antigen</b> | <b>Log MFI without TB<br/>Median (IQR)<sup>b</sup></b> | <b>Log MFI with TB<br/>Median (IQR)<sup>b</sup></b> | <b>p-value<sup>a</sup></b> |
|-------------------|--------------------------------------------------------|-----------------------------------------------------|----------------------------|
| Rv3881            | 2.41 (0-4.15)                                          | 2.88 (0.10-4.25)                                    | 0.09                       |
| Rv0934-P38        | 0 (0-0)                                                | 0 (0-0.89)                                          | 0.02                       |
| Ag85A             | 2.35 (1.38-3.06)                                       | 2.78 (1.8-3.26)                                     | 0.01                       |
| Ag85B             | 2.30 (0.66-3.22)                                       | 2.48 (0.53-3.73)                                    | 0.3                        |
| Ag85C             | 2.88 (1.25-3.81)                                       | 3.39 (2.26-3.93)                                    | 0.02                       |
| Rv3873            | 4.13 (3.36-5.02)                                       | 4.31 (3.77-5.00)                                    | 0.05                       |
| Rv3841-BfrB       | 2.85 (1.78-4.02)                                       | 3.27 (2.15-4.15)                                    | 0.06                       |
| Rv2878c-MPT53     | 2.44 (0-4.53)                                          | 2.11 (0-4.33)                                       | 0.77                       |
| Rv2031-HSPX       | 0 (0-0.51)                                             | 0 (0-2.57)                                          | 0.01                       |
| ESAT-6            | 0 (0-1.98)                                             | 0 (0-3.54)                                          | 0.04                       |
| CFP-10            | 0 (0-2.23)                                             | 0 (0-2.80)                                          | 0.21                       |
| Rv1980-MPT64      | 4.56 (3.68-5.57)                                       | 4.74 (4.16-5.65)                                    | 0.04                       |

IQR: interquartile range; MFI: Median Fluorescence Intensity; TB: tuberculosis

- a. Calculated by permutation testing
- b. Log MFI 0 values represent an untransformed MFI of 0
